# Supplementary material for: Circular RNA cVIM promotes hepatic stellate cell activation in liver fibrosis via miR-122-5p/miR-9-5p-mediated TGF-β signaling cascade
Source: Springer Nature journal article supplement (doi:10.1038/s42003-024-05797-3), 2024-01-19
Supplement: MOESM1 [file 42003_2024_5797_MOESM1_ESM.pdf]

## **Supporting Information**

### **Supplementary materials and methods**

#### **Patients and samples**

Overall, 15 healthy controls, 15 chronic hepatitis B (CHB) patients and 15 CHC patients undergoing liver biopsy from the First Affiliated Hospital of Wenzhou Medical University (FAHWMU) from January 2011 to June 2013 were selected. Serum samples were obtained from patients attending the FAHWMU from January 2011 to December 2015. In total, 110 therapy-naïve patients who had undergone liver biopsy for staging and grading of CHB as well as 110 healthy controls (normal liver biochemistry, no history of liver disease, alcohol abuse or viral hepatitis) were enrolled (Table S1). Inclusion criteria were as follows: CHB defined by detectable serum HB antigen and serum HBV DNA for more than six months. Exclusion criteria were as follows: (i) patient ages <16 years, (ii) co-infection with human immunodeficiency virus (HIV), (iii) coexistence of liver injury caused by other etiologies, including hepatitis C virus (HCV) infection, drug intake, alcohol consumption and auto-immune hepatitis, (iv) severe systematic diseases, (v) pregnancy and lactation. Demographic and clinical information was additionally obtained from all patients. Our study was approved by the Ethics Committee of the FAHWMU and informed consent for use of liver or blood samples obtained from all participants. All ethical regulations relevant to human research participants were followed.

#### **Liver histology**

A 16-gauge Menghini needle was used to performed liver biopsy. Each liver specimen, at least in 2.0 cm, was advised by physicians in care. Samples were collected for hematoxylin-eosin staining, and experienced hepatopathologists reviewed the results. Additionally, a minimum of

8-10 portal tracts in samples was necessary for patient admission. Fibrosis stage (F0 = no fibrosis – F6 = cirrhosis) was assessed using the Ishak scoring system.

### **Blood sampling**

At the time of liver biopsy, blood samples of each patient were collected. Samples were centrifuged at 3400 g for 7 min at room temperature and at 12,000 g for 10 min at 4°C to remove the remaining cells. They were then stored at -80°C for further processing.

### **Virology**

Serum HBV DNA was detected using the Artus HBV QS-RGQ Kit (Qiagen) with a lower detection limit of 10.2 IU/ml. Roche Modular E170 Immunoassay Analyzer (Roche) was used to quantify HBsAg, HBeAg and antibodies against HBsAg, HBeAg and hepatitis B core antigen.

47     **Supplementary Tab.1: Characteristics of CHB patients and healthy subjects**

|               |         | CHB patients (n=110) | healthy subjects (n=110) |
|---------------|---------|----------------------|--------------------------|
| Age (years)   | Mean±SD | 41.5±9.3             | 42.2±10.1                |
| Sex (n)       | Male    | 63(57.2%)            | 61 (55.4%)               |
|               | Female  | 47 (42.8%)           | 49 (44.6%)               |
| ALT (U/L)     | Mean±SD | 115.3±96.1           |                          |
| Liver HBV DNA | Mean±SD | 2.569±4.766          |                          |
| (IU/cells)    |         |                      |                          |
| Serum cVIM    | Mean±SD | 1.869±0.430          |                          |
| HBeAg         | +       | 53 (48.1%)           |                          |
|               | -       | 57 (51.9%)           |                          |
| Fibrosis (n)  | F0      | 7 (6.4%)             |                          |
|               | F1      | 18 (16.4%)           |                          |
|               | F2      | 15 (13.6%)           |                          |
|               | F3      | 16 (14.5%)           |                          |
|               | F4      | 13 (11.8%)           |                          |
|               | F5      | 27 (24.5%)           |                          |
|               | F6      | 14 (12.7%)           |                          |

48

49

50

51

52

53

54

55

56

57

58

59

60

61 **Supplementary Tab.2: Primers used in this study.**

| Primer Name      | Sequence (5'-3')          |
|------------------|---------------------------|
| Mouse            |                           |
| cVIM-F           | ACGGTTGAGACCAGAGATGG      |
| cVIM-R           | AGTGAGGTCAGGCTTGGAAA      |
| cANRIL-F         | CCTCCTCATGTGGAATCACC      |
| cANRIL-R         | TTCAAGGGTCAGCCTCATCT      |
| TGFBR1-F         | AAAGCAGTCAGCTGGCCTTG      |
| TGFBR1-R         | AGGTGGTGCCCTCTGAAATG      |
| TGFBR2-F         | TGGCTTCGAACACCATGGAA      |
| TGFBR2-R         | TAGAGGGCGGTGAACAACAG      |
| NOX4-F           | TGGCCAACGAAGGGGTAAA       |
| NOX4-R           | TCGCCCAACATTTGGTGAATG     |
| KLF6-F           | TGTGGGGTCAAATACAGGGGAA    |
| KLF6-R           | AAGGACTTTTCACCCGTTTCGTTCA |
| TGF $\beta$ 1-F  | ACTGCAAGTCAGAGACGTGG      |
| TGF $\beta$ 1-R  | GGAATAGGGGCGTCTGAGGA      |
| SRF-F            | AGTTGGGGTAGGGTGTCACT      |
| SRF-R            | CCCCATGAAACGTAGGCTGT      |
| FN1-F            | GGTCACCCTGTTCTGCTTCA      |
| FN1-R            | TGTCTGGGTGACTTTCCTGC      |
| Sp1-F            | CCACCATGAGCGACCAAGAT      |
| Sp1-R            | CGTACCCCCATTATTGCCA       |
| Col1A1-F         | CGATGGATTCCCGTTTCGAGT     |
| Col1A1-R         | GAGGCCTCGGTGGACATTAG      |
| $\alpha$ -SMA-F  | TCTTCCAGCCATCTTTCATTGGGAT |
| $\alpha$ -SMA-R  | CCTGTTTTGGCTCCCTATGTCT    |
| Vimentin-F       | AGACCAGAGATGGACAGGTGA     |
| Vimentin-R       | CTGGTACTGCACTGTTGCAC      |
| TIMP1-F          | GCGGTTCTGGGACTTGTGGGCATA  |
| TIMP1-R          | GCCCCCTTTGCATCTCTGGCATC   |
| MMP2-F           | ACCTGGATGCCGTCGTGGACCTG   |
| MMP2-R           | CGCCAGGCTGCTTCACATCCTTC   |
| IL-6-F           | ACAACCACGGCCTTCCCTACTT    |
| IL-6-R           | CACGATTTCCAGAGAACATGTG    |
| TGF- $\beta$ 1-F | GCCCTGGATACCAACTATTGCTTCA |
| TGF- $\beta$ 1-R | CAGAAGTTGGCATGGT          |
| TINCR-F          | CAAGGTACACCTAGCCGACG      |
| TINCR-R          | TTCTGCGCCAAGAGCTTACA      |
| GAPDH-F          | AGGAGAGTGTTCCTCGTCC       |
| GAPDH-R          | TGAGGTCAATGAAGGGGTCG      |
| U6-F             | GAAGATTTAGCATGGCCCCTGC    |
| U6-R             | CAGTGCAGGGTCCGAGGT        |
| cVIM-siRNA-1     | TGCCCTTAAAGGCACTAACGAGT   |
| cVIM-siRNA-2     | AGGATGAGATCCAAAACATGAAG   |

---

Human

|                    |                       |
|--------------------|-----------------------|
| hsa_circ_0000221-F | TGTCGATGTAGTTGGCGAAG  |
| hsa_circ_0000221-R | ACCTCAACGAGAAGGTGGAG  |
| hsa_circ_0007939-F | GGTCAAAGGTATGGCATTGG  |
| hsa_circ_0007939-R | ACTGCTCTTTCCCTGGCTTT  |
| hsa_circ_0017865-F | CGTCACCTTCGTGAATACCA  |
| hsa_circ_0017865-R | AAACTTCTGCAGCCTTTGGA  |
| hsa_circ_0017866-F | TTCCAGCAAGTATCCAACCA  |
| hsa_circ_0017866-R | AAAGCCTGTCTTTGCTCGAA  |
| hsa_circ_0017867-F | AGATGGCCCTTGACATTGAG  |
| hsa_circ_0017867-R | GGAGAAGAGGCGAACGAG    |
| hsa_circ_0017868-F | GGATTCACTCCCTCTGGTTG  |
| hsa_circ_0017868-R | GGAGAAGAGGCGAACGAG    |
| hsa_circ_0017869-F | TTCCAGCAAGTATCCAACCA  |
| hsa_circ_0017869-R | GGAGAAGAGGCGAACGAG    |
| hsa_circ_0017870-F | TCTGGATTCACTCCCTCTGG  |
| hsa_circ_0017870-R | CGCATTGTCAACATCCTGTC  |
| hsa_circ_0017871-F | TTCCAGCAAGTATCCAACCA  |
| hsa_circ_0017871-R | CGCATTGTCAACATCCTGTC  |
| hsa_circ_0017872-F | TGGATTCACTCCCTCTGGTT  |
| hsa_circ_0017872-R | ATTCCACTTTGCGTTCAAGG  |
| hsa_circ_0017873-F | TCCAGCAAGTATCCAACCAA  |
| hsa_circ_0017873-R | CCTCTTCGTGGAGTTTCTTCA |
| hsa_circ_0017874-F | GTACCGGAGACAGGTGCAGT  |
| hsa_circ_0017874-R | GGCTTGGAACATCCACATC   |
| hsa_circ_0017875-F | AGATGGCCCTTGACATTGAG  |
| hsa_circ_0017875-R | GGCTTGGAACATCCACATC   |
| hsa_circ_0017876-F | TCTGGATTCACTCCCTCTGG  |
| hsa_circ_0017876-R | GTGAGGTCAGGCTTGGAAC   |
| hsa_circ_0017877-F | TTCCAGCAAGTATCCAACCA  |
| hsa_circ_0017877-R | GGCTTGGAACATCCACATC   |
| hsa_circ_0017878-F | TCCAGCAAGTATCCAACCAA  |
| hsa_circ_0017878-R | CTGCACCTGTCTCCGGTACT  |
| hsa_circ_0017879-F | CCTACAGGAAGCTGCTGGAA  |
| hsa_circ_0017879-R | GCTTCAACGGCAAAGTTCTC  |
| hsa_circ_0017880-F | TCTGGATTCACTCCCTCTGG  |
| hsa_circ_0017880-R | AACGGCAAAGTTCTCTTCCA  |
| hsa_circ_0017881-F | TCCAGCAAGTATCCAACCAA  |
| hsa_circ_0017881-R | AGGCGGCCAATAGTGTCTT   |
| hsa_circ_0017882-F | TCCAGCAAGTATCCAACCAAC |
| hsa_circ_0017882-R | CCAGAGGGAGTGAATCCAGA  |
| hsa_circ_0017883-F | CGGTTGAACTAGAGATGGACA |
| hsa_circ_0017883-R | TGAGTGGGTATCAACCAGAGG |
| hsa_circ_0017884-F | TTCCAGCAAGTATCCAACCA  |
| hsa_circ_0017884-R | ATTGCTGCACTGAGTGTGTG  |
| hsa_circ_0093230-F | GCAGGAGGAGATGCTTCAGA  |

---

---

|                    |                        |
|--------------------|------------------------|
| hsa_circ_0093230-R | ACTGGCTCCCGGAGAAGAG    |
| hsa_circ_0093232-F | ACCTCTACGAGGAGGAGATGC  |
| hsa_circ_0093232-R | GCAGGATCTTATTCTGCTGCTC |
| hsa_circ_0093233-F | ACCTCTACGAGGAGGAGATGC  |
| hsa_circ_0093233-R | TGTCGATGTAGTTGGCGAAG   |

---

62  
63  
64  
65  
66  
67  
68  
69  
70  
71  
72  
73  
74  
75  
76  
77  
78  
79  
80  
81  
82  
83  
84  
85  
86  
87  
88  
89  
90  
91  
92  
93  
94  
95  
96  
97  
98  
99  
100  
101  
102  
103  
104  
105  
106

| circRNA            | Regulation | GeneSymbol    | P-value     |
|--------------------|------------|---------------|-------------|
| mmu_circRNA_29981  | up         | App           | 0.049175159 |
| mmu_circRNA_012164 | up         | Hist1h1c      | 0.002970874 |
| mmu_circRNA_20588  | up         | Pam           | 0.014034001 |
| mmu_circRNA_37780  | up         | Syf2          | 0.024078973 |
| mmu_circRNA_007217 | up         | Hist1h1c      | 0.003261803 |
| mmu_circRNA_40537  | up         | Antxr1        | 0.033347472 |
| mmu_circRNA_23791  | up         | Spag5         | 0.0381213   |
| mmu_circRNA_36840  | up         | Svep1         | 0.034132532 |
| mmu_circRNA_018777 | up         | Col3a1        | 0.009699984 |
| mmu_circRNA_26326  | up         | Sema4d        | 0.016765115 |
| mmu_circRNA_34451  | up         | Fbn1          | 0.010741952 |
| mmu_circRNA_23124  | up         | Rtn4          | 0.049617416 |
| mmu_circRNA_29984  | up         | Ltn1          | 0.040634076 |
| mmu_circRNA_37916  | up         | Pgd           | 0.027174359 |
| mmu_circRNA_015902 | up         | Clip2         | 0.005204066 |
| mmu_circRNA_24182  | up         | Acly          | 0.000201364 |
| mmu_circRNA_19118  | up         | Samd4         | 0.048250246 |
| mmu_circRNA_37328  | up         | Dhcr24        | 0.028201056 |
| mmu_circRNA_30668  | up         | Adgre1        | 0.003752486 |
| mmu_circRNA_19794  | up         | Lmbrd1        | 0.043492598 |
| mmu_circRNA_19982  | up         | Map4k4        | 0.042358766 |
| mmu_circRNA_27519  | up         | Samd4         | 0.038562935 |
| mmu_circRNA_19346  | up         | Pgd           | 0.037615846 |
| mmu_circRNA_34309  | up         | Rtf1          | 0.004720457 |
| mmu_circRNA_32665  | up         | Btrc          | 0.031973352 |
| mmu_circRNA_39081  | up         | Sparcl1       | 0.0101094   |
| mmu_circRNA_34779  | up         | Tpx2          | 0.021333323 |
| mmu_circRNA_29154  | up         | Ppl           | 0.00153531  |
| mmu_circRNA_28239  | up         | Npr3          | 0.049582734 |
| mmu_circRNA_005305 | up         | Samd4         | 0.049573841 |
| mmu_circRNA_45890  | up         | Rps6ka3       | 0.04247312  |
| mmu_circRNA_26413  | up         | Ntrk2         | 0.041744953 |
| mmu_circRNA_39653  | up         | Baiap211      | 0.002078411 |
| mmu_circRNA_22197  | up         | Bicc1         | 0.037300025 |
| mmu_circRNA_017702 | up         | Slc35f5       | 0.042870363 |
| mmu_circRNA_44559  | up         | Myo1e         | 0.005579929 |
| mmu_circRNA_36691  | up         | Unc13b        | 0.005411979 |
| mmu_circRNA_34279  | up         | Knstrn        | 0.034316795 |
| mmu_circRNA_000298 | up         | Ect2          | 0.001133466 |
| mmu_circRNA_32994  | up         | Vim           | 0.020330809 |
| mmu_circRNA_34544  | up         | Sirpa         | 0.011532885 |
| mmu_circRNA_011784 | up         | Arhgap10      | 0.008056417 |
| mmu_circRNA_45392  | up         | Rp2h          | 0.013447414 |
| mmu_circRNA_30260  | up         | Smoc2         | 0.001386797 |
| mmu_circRNA_006940 | down       | 9130011E15Rik | 0.043846956 |
| mmu_circRNA_25777  | down       | Serpina4-ps1  | 0.017909055 |
| mmu_circRNA_21916  | down       | Rtn4ip1       | 0.049761176 |

|                   |      |          |             |
|-------------------|------|----------|-------------|
| mmu_circRNA_21120 | down | Tnr      | 0.047860526 |
| mmu_circRNA_28144 | down | Ghr      | 0.032418353 |
| mmu_circRNA_29063 | down | Fam186b  | 0.004624547 |
| mmu_circRNA_28834 | down | Slc25a17 | 0.039413973 |
| mmu_circRNA_22878 | down | Camk2b   | 0.043426037 |
| mmu_circRNA_21911 | down | Sobp     | 0.025312431 |
| mmu_circRNA_25732 | down | Atxn3    | 0.046665629 |
| mmu_circRNA_39652 | down | Lmtk2    | 0.038077759 |
| mmu_circRNA_37243 | down | Raver2   | 0.043913776 |
| mmu_circRNA_39156 | down | Ep400    | 0.002552742 |
| mmu_circRNA_32345 | down | Kank1    | 0.016208401 |
| mmu_circRNA_42397 | down | Lhpp     | 0.018030244 |
| mmu_circRNA_42398 | down | Lhpp     | 0.007353568 |
| mmu_circRNA_26977 | down | Ppap2a   | 0.037184896 |
| mmu_circRNA_22784 | down | Tmem194  | 0.021444162 |
| mmu_circRNA_36581 | down | Bach2    | 0.046418701 |
| mmu_circRNA_34113 | down | Slc1a2   | 0.000341918 |
| mmu_circRNA_25382 | down | Gphn     | 0.02254617  |
| mmu_circRNA_41020 | down | Slco1b2  | 0.006157182 |
| mmu_circRNA_38486 | down | Rgs12    | 0.023791373 |
| mmu_circRNA_31987 | down | Dym      | 0.043242595 |
| mmu_circRNA_36004 | down | Slc30a7  | 0.047274749 |
| mmu_circRNA_32003 | down | Pias2    | 0.000185612 |
| mmu_circRNA_42780 | down | Dctn6    | 0.005768733 |

108  
109  
110  
111  
112  
113  
114  
115  
116  
117  
118  
119  
120  
121  
122  
123  
124  
125  
126  
127  
128  
129  
130  
131  
132  
133  
134



| miRNA             | Max<br>Score | Max<br>Energy | Binding position In cVIM | Predicted by<br>RNAhybrid |
|-------------------|--------------|---------------|--------------------------|---------------------------|
| mmu-miR-30a-5p    | 103          | -21.66        | 40,128                   | Yes                       |
| mmu-miR-125a-3p   | 109          | -26.37        | 57,179                   | Yes                       |
| mmu-miR-9-5p      | 97           | -20.27        | 611                      | Yes                       |
| mmu-miR-149-3p    | 98           | -24.89        | 520,149, 568,56          | Yes                       |
| mmu-miR-187-3p    | 96           | -24.4         | 342,616,179,115          | Yes                       |
| mmu-miR-191-3p    | 99           | -23.01        | 231,143                  | Yes                       |
| mmu-miR-200b-5p   | 95           | -24.46        | 73,428,294               | Yes                       |
| mmu-miR-143-5p    | 98           | -29.24        | 236,98                   | Yes                       |
| mmu-miR-23a-5p    | 95           | -22.73        | 466,564,1                | Yes                       |
| mmu-miR-26b-3p    | 101          | -24.94        | 488,222                  | Yes                       |
| mmu-miR-93-3p     | 96           | -20.79        | 479                      | Yes                       |
| mmu-miR-34a-5p    | 87           | -26.41        | 167,97                   | Yes                       |
| mmu-miR-326-5p    | 97           | -26.33        | 414,272,54,96            | Yes                       |
| mmu-miR-328-3p    | 103          | -32.07        | 66,520,560,166,5         | Yes                       |
| mmu-miR-330-3p    | 89           | -23.59        | 73,172                   | Yes                       |
| mmu-miR-122-5p    | 97           | -20.98        | 356                      | Yes                       |
| mmu-miR-337-5p    | 98           | -25.57        | 73,596                   | Yes                       |
| mmu-miR-341-5p    | 93           | -23.25        | 352,288                  | Yes                       |
| mmu-miR-345-3p    | 93           | -28.44        | 12,207,129               | Yes                       |
| mmu-miR-346-3p    | 101          | -30.48        | 505,2,204                | Yes                       |
| mmu-miR-107-3p    | 97           | -22.24        | 467                      | Yes                       |
| mmu-miR-17-3p     | 110          | -24.12        | 59,242                   | Yes                       |
| mmu-miR-25-5p     | 93           | -22.73        | 152                      | Yes                       |
| mmu-miR-212-5p    | 87           | -21.90        | 477                      | Yes                       |
| mmu-miR-320-5p    | 97           | -23.57        | 491,123                  | Yes                       |
| mmu-miR-26a-2-3p  | 94           | -21.47        | 227                      | Yes                       |
| mmu-miR-29b-2-5p  | 101          | -20.51        | 608,404                  | Yes                       |
| mmu-miR-125b-1-3p | 102          | -24.85        | 57,232,116,1,169         | Yes                       |
| mmu-miR-217-5p    | 90           | -20.61        | 247                      | Yes                       |
| mmu-miR-378a-5p   | 96           | -26.57        | 227,13,477,201           | Yes                       |
| mmu-miR-381-3p    | 100          | -22.24        | 323                      | Yes                       |
| mmu-miR-215-3p    | 103          | -22.17        | 263                      | Yes                       |
| mmu-miR-196b-5p   | 106          | -24.29        | 472,98,236,286           | Yes                       |
| mmu-miR-412-5p    | 99           | -22.31        | 566                      | No                        |
| mmu-miR-434-3p    | 103          | -25.66        | 133                      | No                        |
| mmu-miR-465a-3p   | 97           | -20.31        | 439                      | No                        |
| mmu-miR-540-3p    | 98           | -24.08        | 506,353                  | No                        |
| mmu-miR-423-5p    | 99           | -24.36        | 507,153,63,563           | No                        |
| mmu-miR-681       | 101          | -25.57        | 100,165                  | No                        |
| mmu-miR-1298-3p   | 99           | -21.02        | 22                       | No                        |
| mmu-miR-764-3p    | 100          | -24.73        | 354                      | No                        |
| mmu-miR-652-5p    | 103          | -24.27        | 562                      | No                        |
| mmu-miR-490-3p    | 98           | -25.20        | 557                      | No                        |
| mmu-miR-693-3p    | 111          | -22.00        | 468,163,94,247           | No                        |
| mmu-miR-146b-3p   | 107          | -23.92        | 285,187,258              | No                        |
| mmu-miR-698-5p    | 100          | -23.18        | 459,569                  | No                        |

|                   |     |        |                   |    |
|-------------------|-----|--------|-------------------|----|
| mmu-miR-717       | 101 | -21.47 | 502               | No |
| mmu-miR-3099-3p   | 97  | -24.89 | 521,163,66        | No |
| mmu-miR-344d-1-5p | 103 | -21.54 | 100,352,6         | No |
| mmu-miR-676-3p    | 97  | -24.61 | 116               | No |
| mmu-miR-615-3p    | 103 | -27.21 | 7,612             | No |
| mmu-miR-453       | 100 | -22.41 | 156,351           | No |
| mmu-miR-92b-3p    | 98  | -27.08 | 231,299,134       | No |
| mmu-miR-873a-5p   | 101 | -20.90 | 280               | No |
| mmu-miR-877-3p    | 103 | -25.33 | 490,134           | No |
| mmu-miR-1894-5p   | 98  | -22.13 | 481               | No |
| mmu-miR-1930-3p   | 99  | -22.47 | 242,76            | No |
| mmu-miR-1231-5p   | 98  | -25.51 | 511,67,25,601,171 | No |

136  
137  
138  
139  
140  
141  
142  
143  
144  
145  
146  
147  
148  
149  
150  
151  
152  
153  
154  
155  
156  
157  
158  
159  
160  
161  
162  
163  
164  
165  
166  
167  
168  
169  
170  
171  
172  
173  
174

**Supplementary Tab.5: TGF- $\beta$  pathway-related genes which are the targets of miR-9-5p and miR-122-5p.**

| TGF- $\beta$ pathway-related genes | miRNAs     | The studies proving that they are the targets of the indicated miRNAs                                                                                          |
|------------------------------------|------------|----------------------------------------------------------------------------------------------------------------------------------------------------------------|
| TGFBR1 and TGFBR2                  | miR-9-5p   | Epigenetically-Regulated MicroRNA-9-5p Suppresses the Activation of Hepatic Stellate Cells via TGFBR1 and TGFBR2 <sup>1</sup>                                  |
| TGFBR2                             | miR-9-5p   | Protective role for miR-9-5p in the fibrogenic transformation of human dermal fibroblasts <sup>2</sup>                                                         |
| TGFBR2 and NOX4                    | miR-9-5p   | miR-9-5p suppresses pro-fibrogenic transformation of fibroblasts and prevents organ fibrosis by targeting NOX4 and TGFBR2 <sup>3</sup>                         |
| KLF6                               | miR-122-5p | NEAT1 accelerates the progression of liver fibrosis via regulation of microRNA-122 and Kruppel-like factor 6 <sup>4</sup>                                      |
| TGF- $\beta$ 1                     | miR-122    | microRNA-122 down-regulation may play a role in severe myocardial fibrosis in human aortic stenosis through TGF- $\beta$ 1 up-regulation <sup>5</sup>          |
| TGFBR2                             | miR-122-5p | miR-24 and miR-122 Negatively Regulate the Transforming Growth Factor- $\beta$ /Smad Signaling Pathway in Skeletal Muscle Fibrosis <sup>6</sup>                |
| SRF and FN1                        | miR-122-5p | Identification of a novel TGF- $\beta$ -miR-122-fibronectin 1/serum response factor signaling cascade and its implication in hepatic fibrogenesis <sup>7</sup> |

**Supplementary Fig. 1 Expression of cVIM in primary HSCs and primary hepatocytes. a**

Expressions of circRNA\_39081, circRNA\_32994 (cVIM) and circRNA\_34779 in primary HSCs isolated from CCl<sub>4</sub>-treated mice as well as healthy controls (n=6 per group). **b** cVIM was detected in primary HSCs and hepatocytes, which were isolated from healthy mice (n=6 per group). **(c and d)** cVIM was detected in primary HSCs (c) and hepatocytes (d), which were isolated from CCl<sub>4</sub>-treated mice at different weeks (n=6 per group). Each value is the mean  $\pm$  SD of six independent experiments. \*\**P*<0.01 compared with the control.

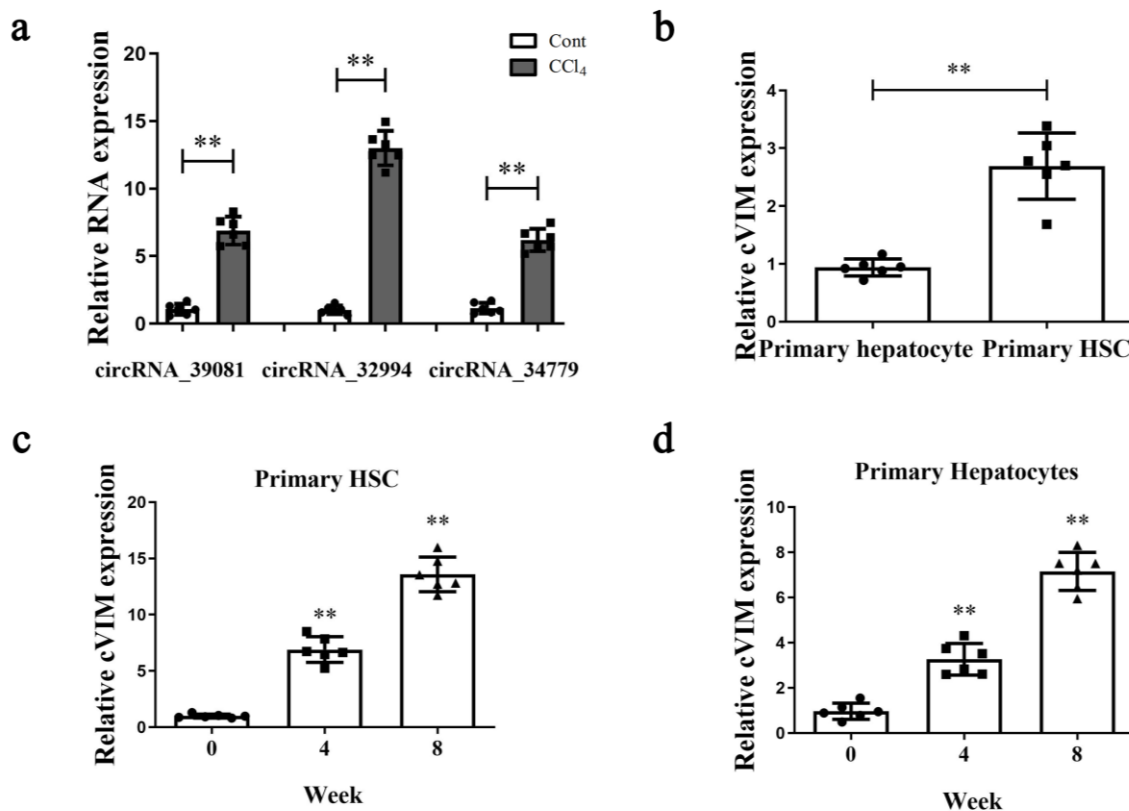

**Supplementary Fig. 2 Sanger sequencing showing the back-spliced events of cVIM.**

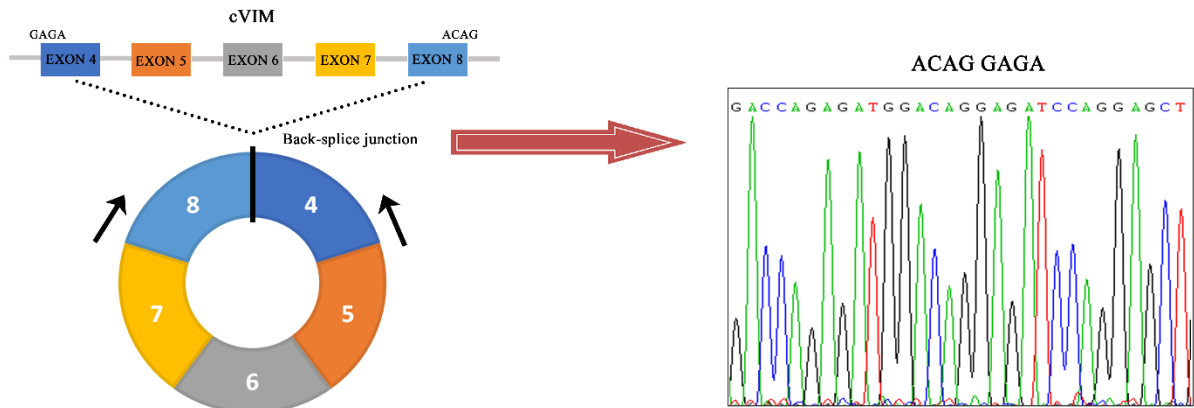

**Supplementary Fig. 3 Expression of cVIM *in vitro* and *in vivo* after cVIM knockdown**

**treatment. a** Expression of cVIM in primary 1-day-old HSCs isolated from CCl<sub>4</sub>-treated mice after cVIM siRNA treatment for 48 h (n=3 per group). **b** cVIM in the liver from CCl<sub>4</sub>-treated mice after Ad-shcVIM treatment (n=6 per group). **(c and d)** cVIM in isolated primary HSCs (c) as well as primary hepatocytes (d) from CCl<sub>4</sub>-treated mice after Ad-shcVIM treatment (n=6 per group). **e** Expression of mVIM after silencing of cVIM *in vitro* (n=3 per group) and *in vivo* (n=6 per group). **f** ECM markers in liver tissues of CCl<sub>4</sub>-treated mouse (n=6 per group). **(g and h)** Profibrotic cytokines in HSCs (g) and in liver tissues (h) (n=6 per group). Each value is the mean  $\pm$  SD of three independent experiments. \**P*<0.05 and \*\**P*<0.01 compared with the control.

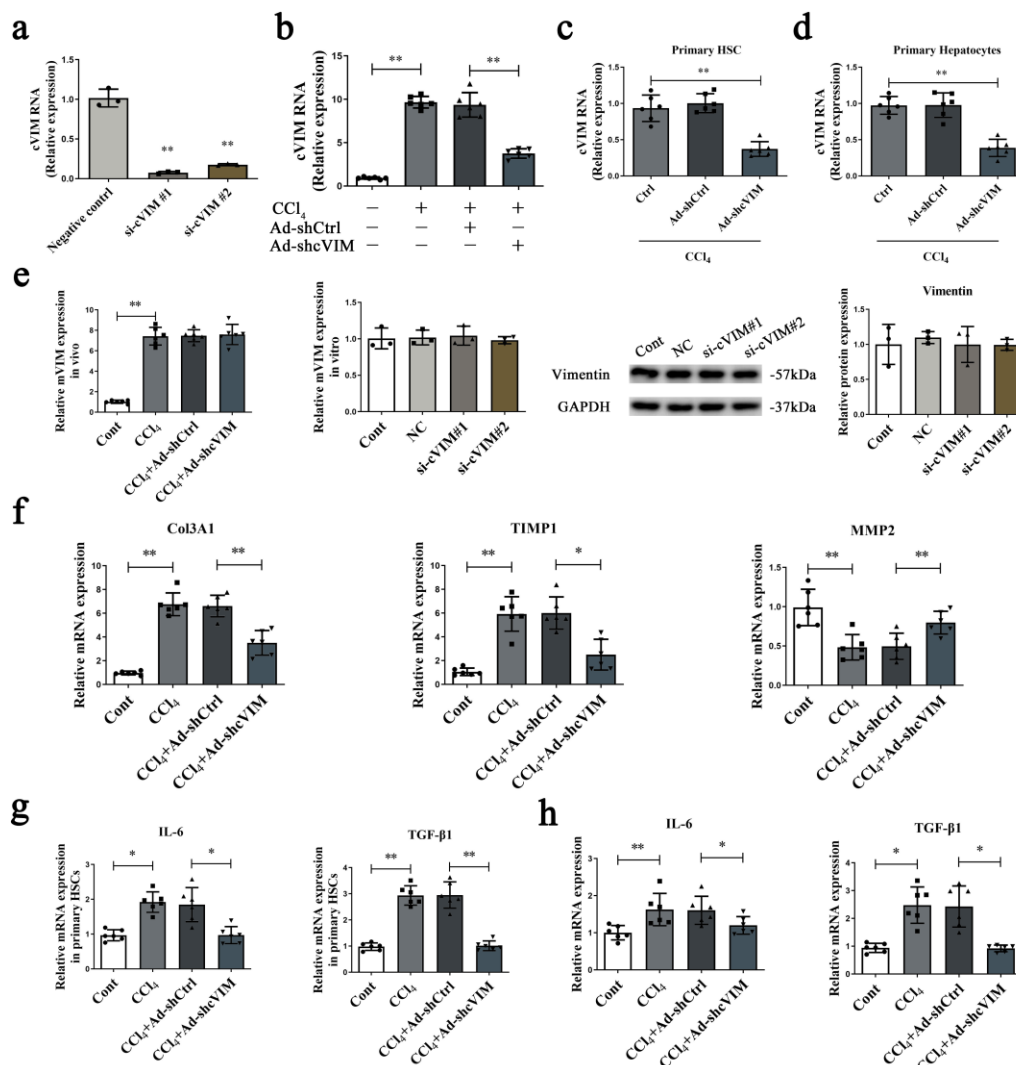

226 **Supplementary Fig.4 cVIM functions as a sponge for miR-122-5p and miR-9-5p. a**  
227 Co-localization between miR-122-5p/miR-9-5p and cVIM was observed by FISH in primary  
228 1-day-old HSCs isolated from CCl<sub>4</sub>-treated mice. Nuclei were stained with DAPI (n=3 per  
229 group). Scale bar, 25 μm. **b** qRT-PCR showed that cVIM did not change significantly upon  
230 miR-122-5p or miR-9-5p mimics/inhibitor in primary 1-day-old HSCs isolated from CCl<sub>4</sub>-treated  
231 mice. qRT-PCR showed that miR-122-5p or miR-9-5p did not change significantly after  
232 overexpressing or silencing cVIM in primary 1-day-old HSCs isolated from CCl<sub>4</sub>-treated mice  
233 (n=3 per group). **c** The expressions of miR-122-5p and miR-9-5p were decreased in the fibrotic  
234 livers (n=6 per group). Each value is the mean ± SD of three independent experiments. \**P*<0.05.

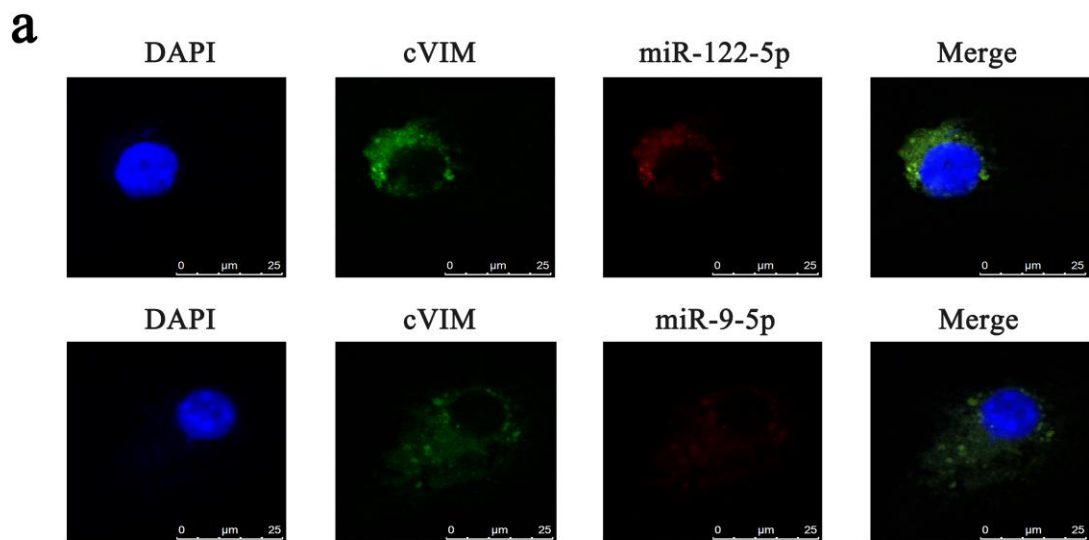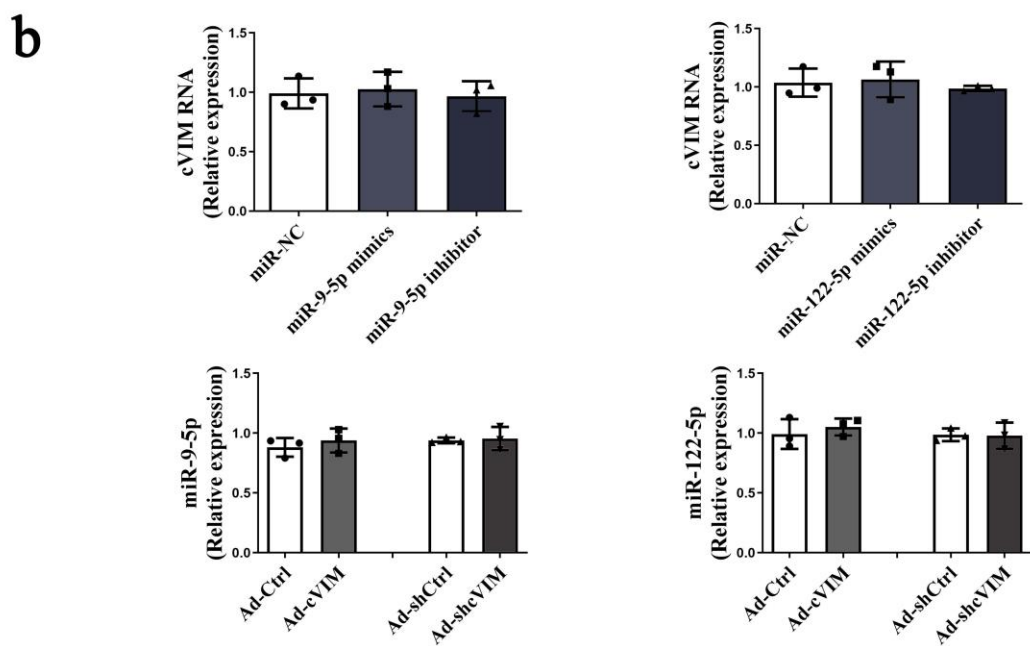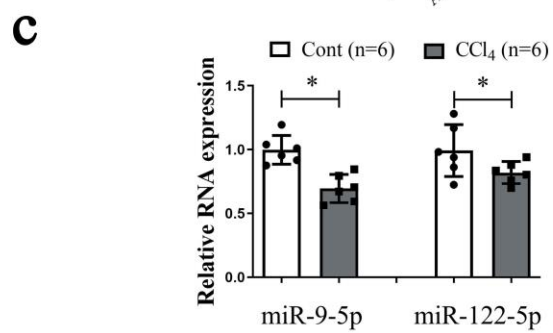

235

236



**Supplementary Fig.5 cVIM inhibits liver fibrosis through TGFBR1/TGFBR 2-mediated**

**TGF- $\beta$  pathway activation.** Primary 1-day-old HSCs isolated from CCl<sub>4</sub>-treated mice were

transduced with Ad-cVIM or Ad-shcVIM for 48 h. Cells were also transfected with miR-122-5p

or miR-9-5p mimics for 24 h. **a** Signaling pathway reporter array was used for seeking the

relative pathway associated with cVIM (n=3 per group). **b** qRT-PCR showed that the targets of

miR-9-5p (TGFBR1, TGFBR2 and NOX4) were significantly downregulated upon

overexpression of miR-9-5p, and the targets of miR-122-5p (KLF6, TGF- $\beta$ 1, TGFBR2, SRF and

FN1) were significantly downregulated upon overexpression of miR-122-5p (n=3 per group). **c**

The targets of miR-9-5p and miR-122-5p were examined in cells after overexpressing or

silencing cVIM (n=3 per group). Each value is the mean  $\pm$  SD of three independent experiments.

**\*\* $P$ <0.01.**

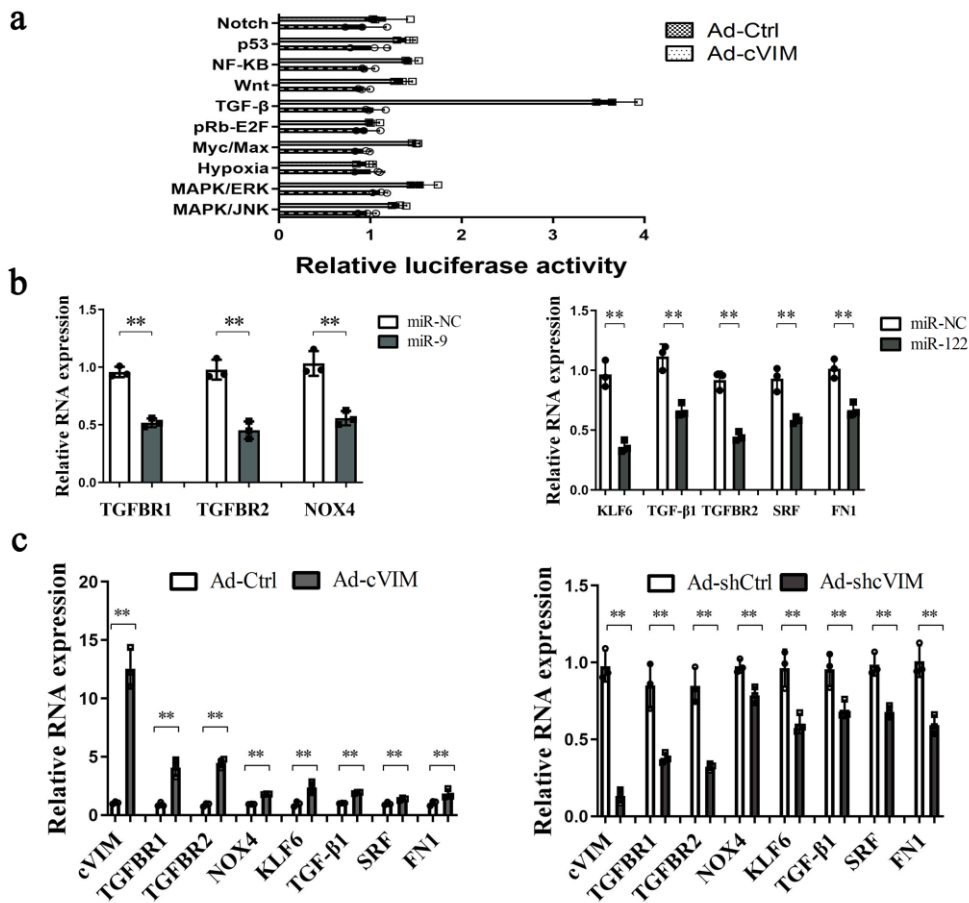

**Supplementary Fig.6 cVIM accelerates liver fibrosis progression via**

**miR-122-5p/miR-9-5p-mediated TGF- $\beta$  pathway.** Primary 1-day-old HSCs isolated from

CCl<sub>4</sub>-treated mice were transduced with Ad-cVIM for 48 h and then transfected with

miR-122-5p/miR-9-5p mimics for additional 24 h. Moreover, cells were transduced with

Ad-shcVIM for 48 h and then transfected with miR-122-5p/miR-9-5p inhibitor for additional 24

h. **a** Reduced TGFBR1 by miR-122-5p or miR-9-5p was blocked down by overexpression of

cVIM (n=3 per group). **b** Reduced TGFBR2 by miR-122-5p or miR-9-5p was blocked down by

overexpression of cVIM (n=3 per group). **c** Immunoblot analysis showed that miR-122-5p or

miR-9-5p inhibitor inhibited the downregulation of p-smad2,  $\alpha$ -SMA and type I collagen induced

by cVIM knockdown (n=3 per group). Each value is the mean  $\pm$  SD of three independent

experiments. \* $P$ <0.05, \*\* $P$ <0.01 and \*\*\* $P$ <0.001.

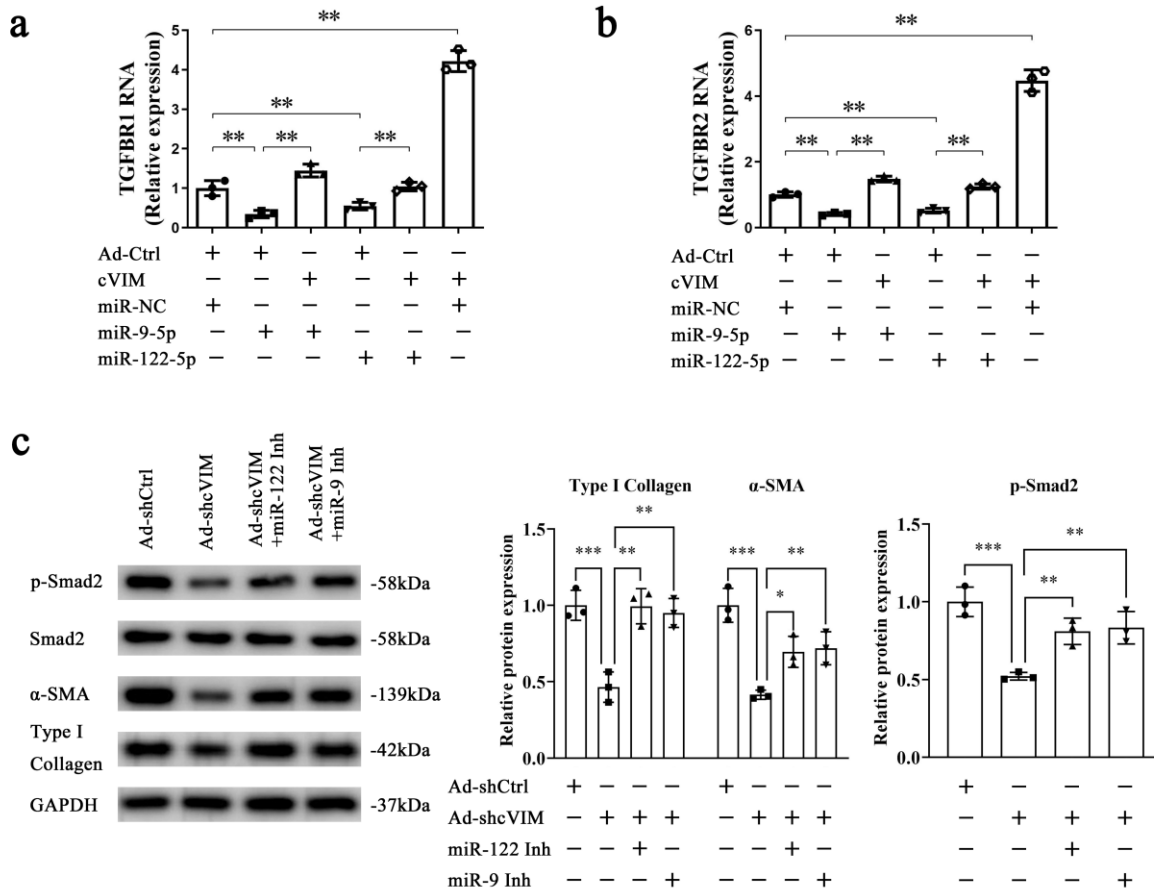

**Supplementary Fig.7 Overexpression of cVIM contributes to the expression of Sp1.** Primary 1-day-old HSCs isolated from CCl<sub>4</sub>-treated mice were transduced with Ad-cVIM or Ad-shcVIM for 48 h. **a** Sp1 mRNA expression (n=3 per group). **b** Sp1 protein expression (n=3 per group). **c** Expression of Sp1 in activated HSCs isolated from CCl<sub>4</sub>-treated mice (n=6 per group). **d** Expression of Sp1 in CHB patients with liver fibrosis (n=15 per group). Each value is the mean  $\pm$  SD of three independent experiments. \* $P$ <0.05 and \*\* $P$ <0.01.

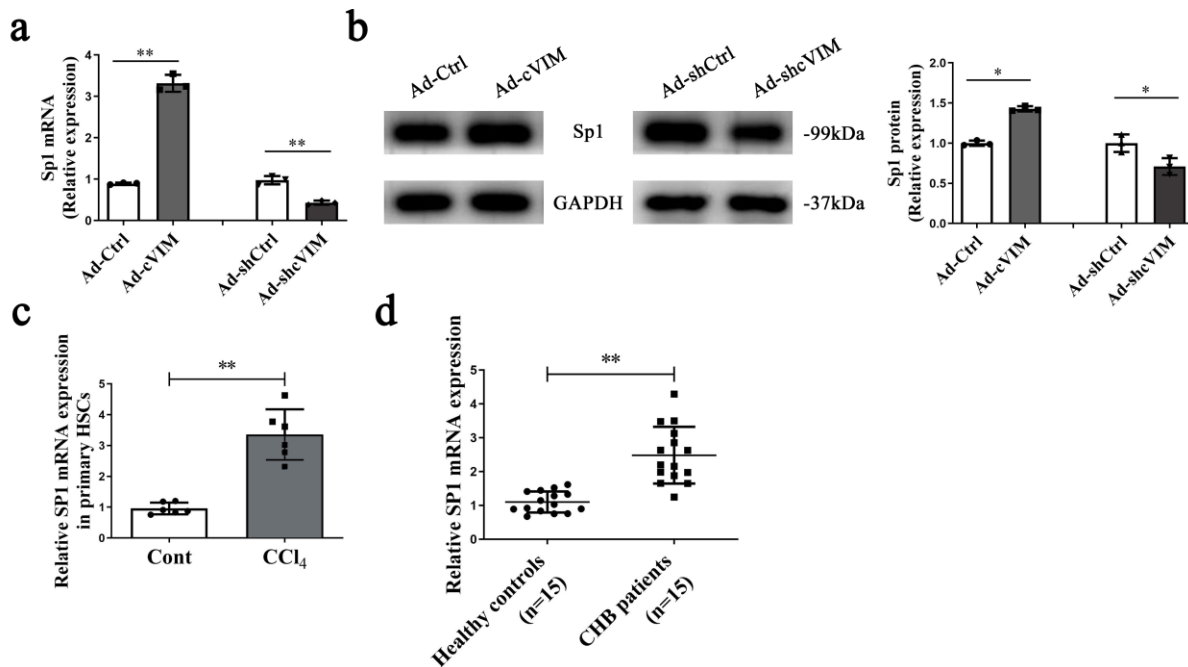

**Supplementary Fig.8 Effects of loss of cVIM in hepatocytes.** Primary hepatocytes were transduced with Ad-shcVIM for 48 h and then transfected with miR-122-5p/miR-9-5p inhibitor for additional 24 h. **a** mRNA expressions of TGFBR1 and TGFBR2 (n=3 per group). **b** Protein expressions of TGFBR1 and TGFBR2 (n=3 per group). **c** Cell proliferation (n=3 per group). **d** mRNA expression of Col1A1 (n=3 per group). **e** Protein expressions of p-smad2 and type I collagen (n=3 per group). **f** cVIM expression (n=3 per group). cVIM expression was examined in primary hepatocytes with Sp1 siRNA for 48 h. Each value is the mean  $\pm$  SD of three independent experiments. \* $P$ <0.05, \*\* $P$ <0.01 and \*\*\* $P$ <0.001.

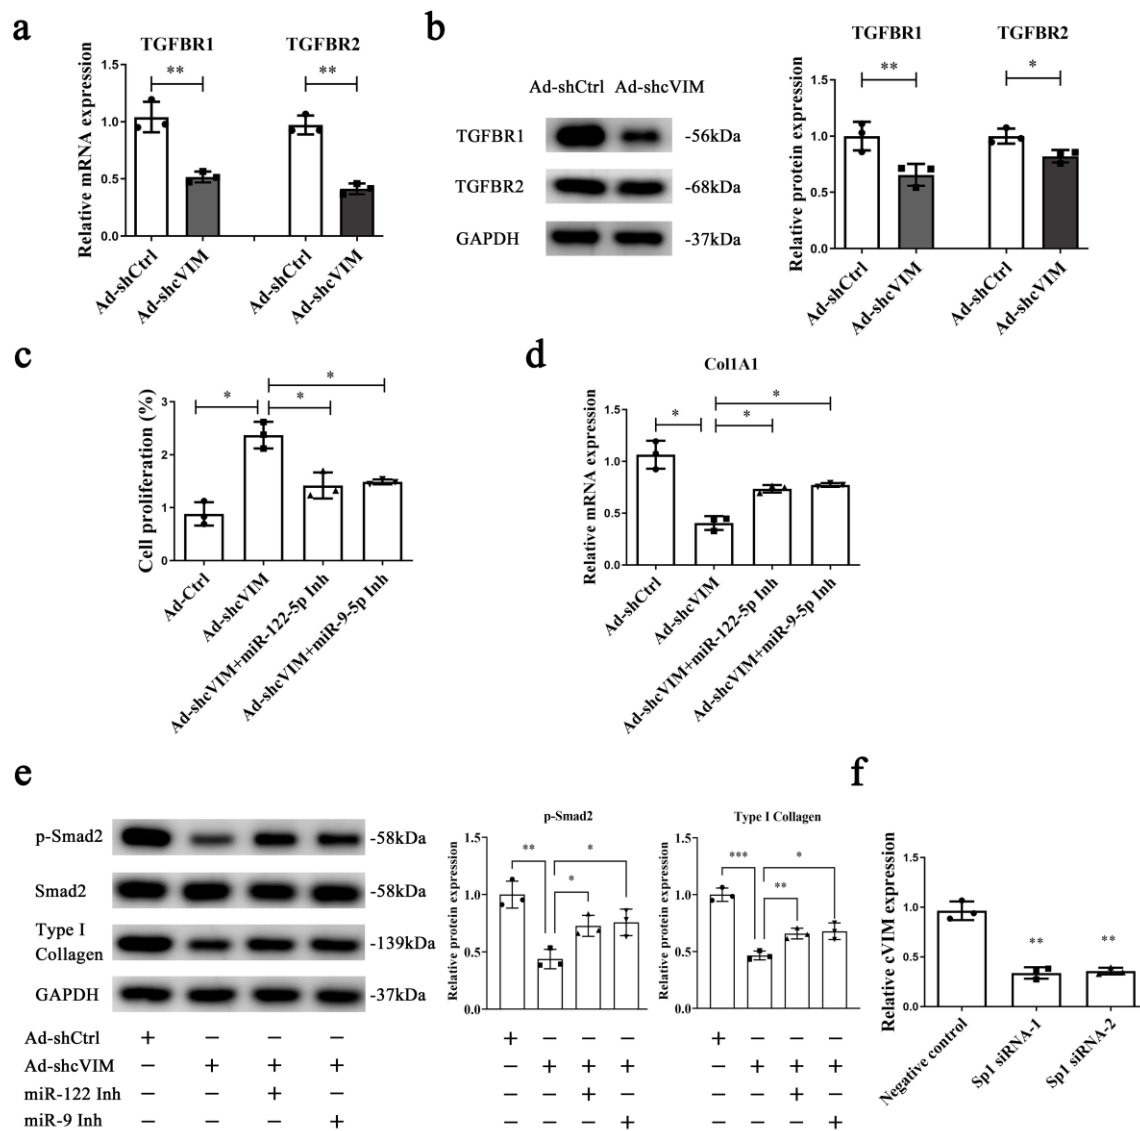

**Supplementary Fig.9 Expression of liver cVIM and serum cVIM in patients with liver**

**fibrosis. (a and b)** All circRNA splices derived from human VIM gene were detected in the liver

tissues from CHB patients (a, n=15 per group) and CHC patients (b, n=15 per group). **c** Serum

cVIM levels in CHB patients (n=110 per group). **d** ROC curve analysis of serum cVIM for

discriminating CHB patients with liver fibrosis (n=110 per group) from healthy controls (n=110

per group). **e** Serum cVIM levels in CHB patients with different fibrosis scores (n=110 per

group). **f** The expression levels of miR-9-5p, miR-122-5p, TGFBR1 or TGFBR2 in liver samples

from CHB patients (n=15 per group). Each value is the mean  $\pm$  SD of three independent

experiments. \*\* $P < 0.01$  compared with the control.

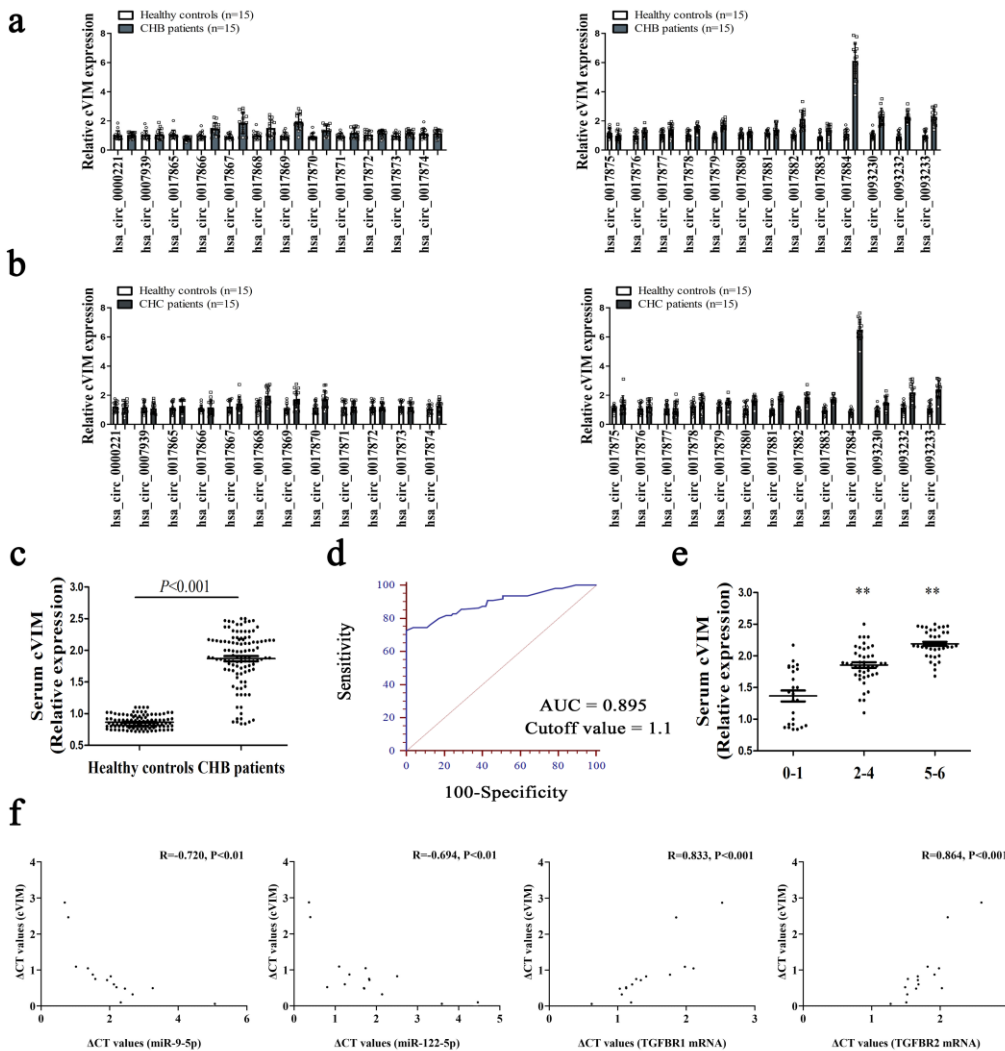

**Supplementary Fig.10 Expression of cVIM and mVIM after Sp1 overexpression.** Each value is the mean  $\pm$  SD of three independent experiments.  $**P<0.01$ .

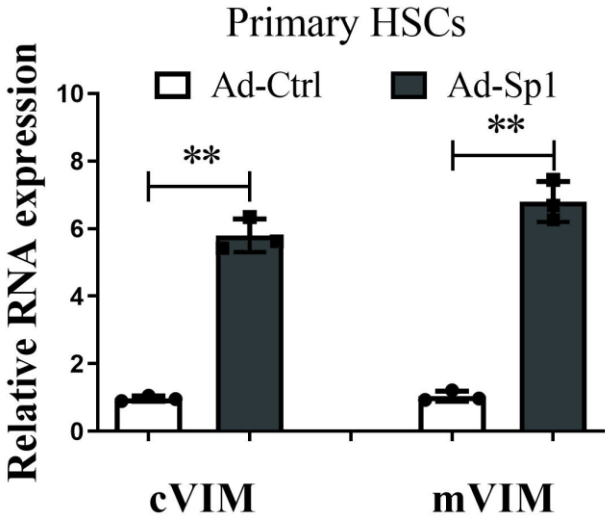

**Supplementary Fig.11 Roles of cVIM in hepatocytes.** **a** Trypan blue staining analysis (n=3 per group). **b** CCK-8 analysis (n=3 per group). **c** Cell cycle analysis (n=3 per group). Each value is the mean  $\pm$  SD of three independent experiments. \* $P$ <0.05 and \*\* $P$ <0.01.

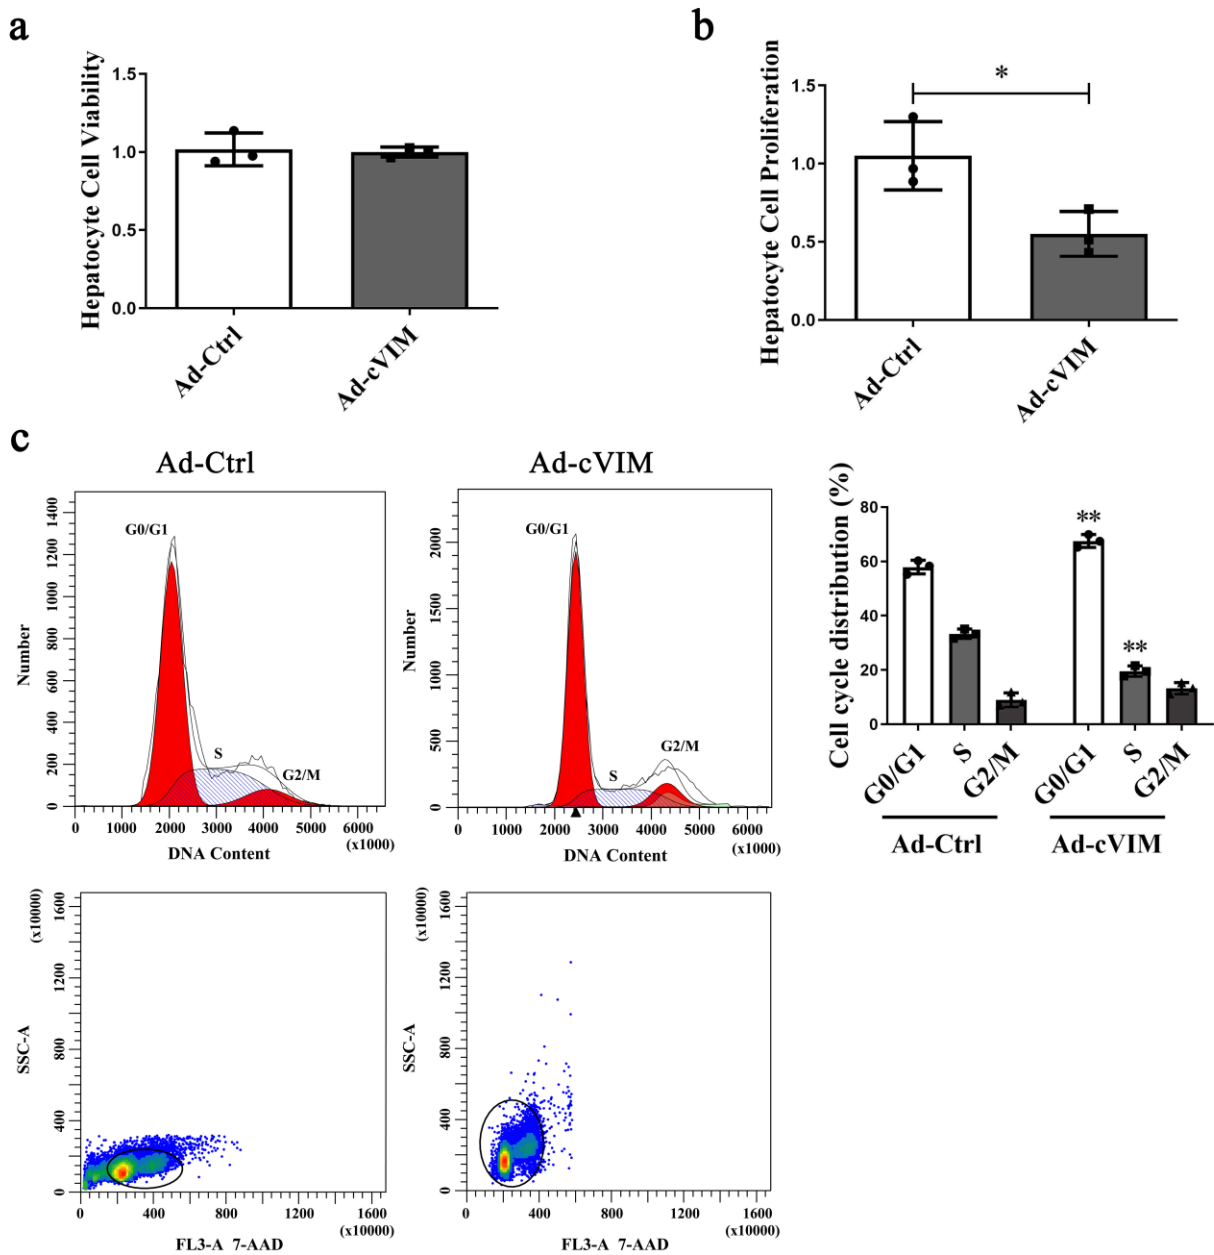

Fig.3g

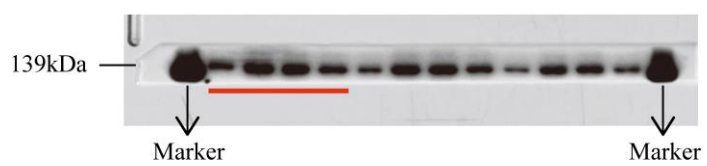

**Type I Collagen**

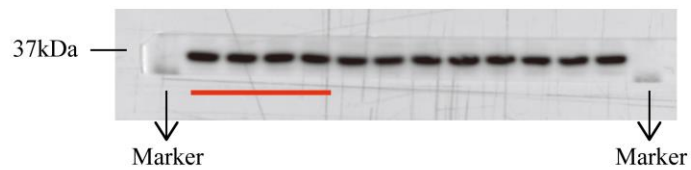

**GAPDH**



Fig.5b

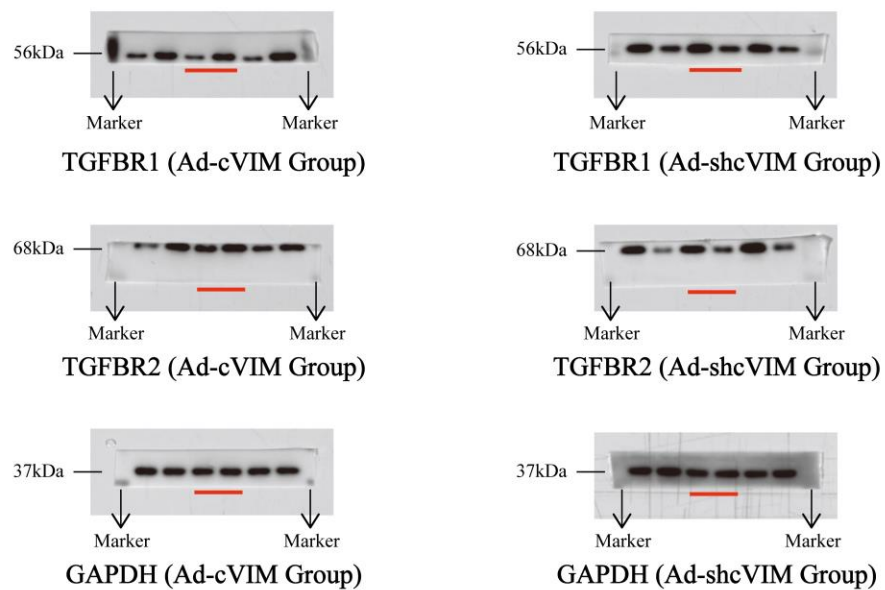

Fig.5c

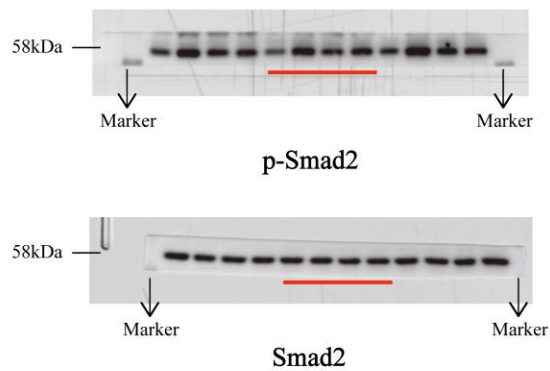

Fig.5f

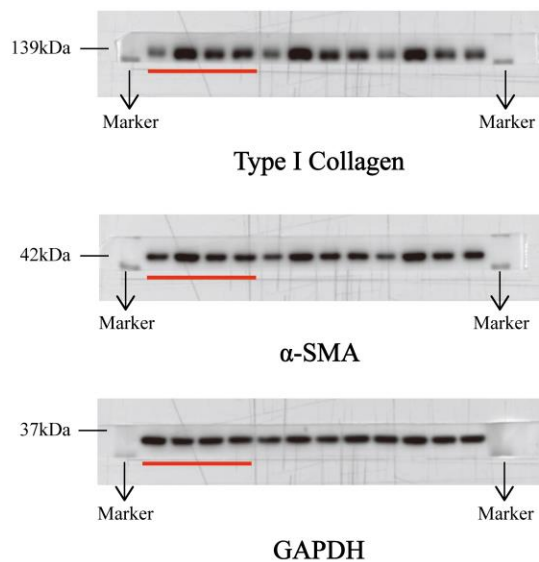

Fig.S3e

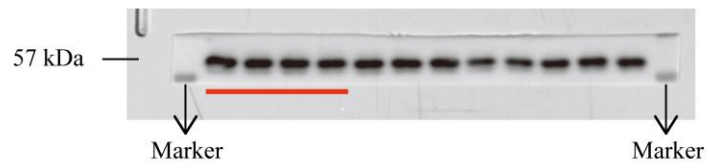

Vimentin

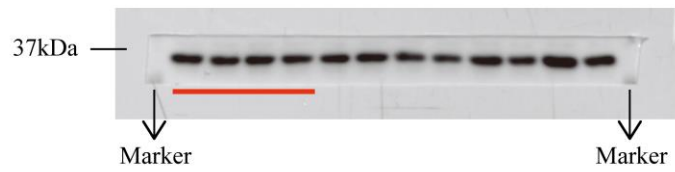

GAPDH

330  
331

Fig.S6c

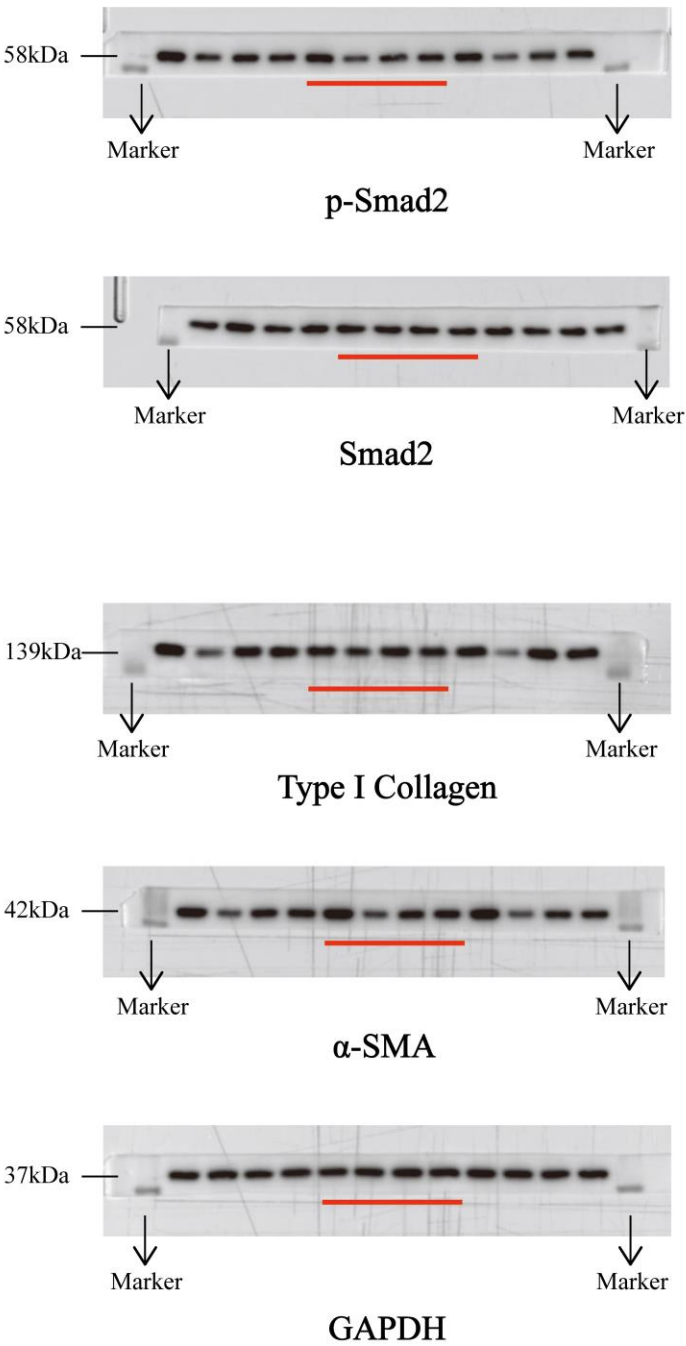

Fig.S7b

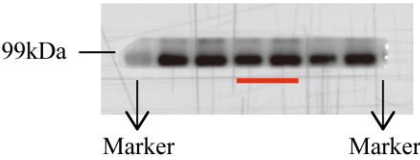

Sp1 (Ad-cVIM Group)

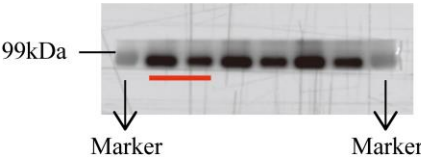

Sp1 (Ad-shcVIM Group)

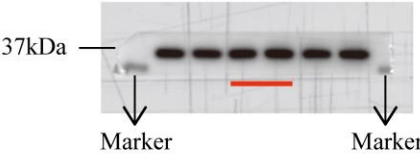

GAPDH (Ad-cVIM Group)

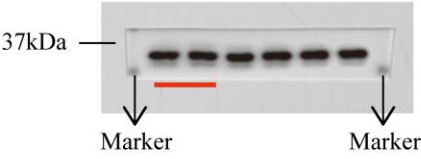

GAPDH (Ad-shcVIM Group)

337  
338  
339

Fig.S8b

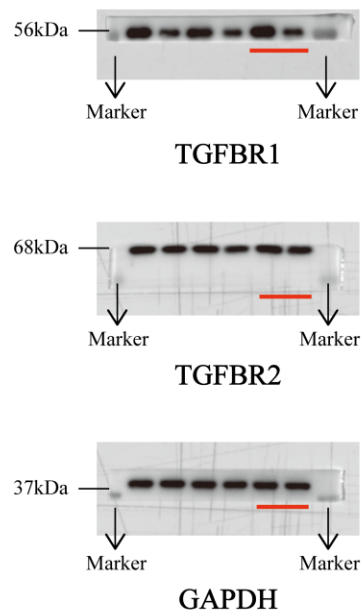

Fig.S8e

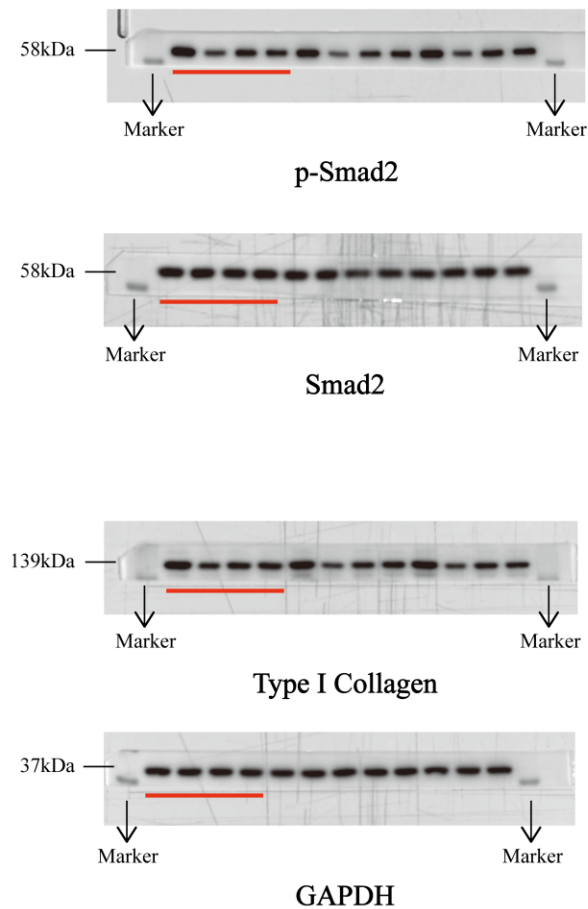

341     **Supplementary References**

- 342     1     Yu, F. *et al.* Epigenetically-Regulated MicroRNA-9-5p Suppresses the Activation of Hepatic  
343         Stellate Cells via TGFBR1 and TGFBR2. *Cell Physiol Biochem* **43**, 2242-2252,  
344         doi:10.1159/000484303 (2017).
- 345     2     Miguel, V., Busnadiego, O., Fierro-Fernandez, M. & Lamas, S. Protective role for miR-9-5p in the  
346         fibrogenic transformation of human dermal fibroblasts. *Fibrogenesis & tissue repair* **9**, 7,  
347         doi:10.1186/s13069-016-0044-2 (2016).
- 348     3     Fierro-Fernandez, M. *et al.* miR-9-5p suppresses pro-fibrogenic transformation of fibroblasts and  
349         prevents organ fibrosis by targeting NOX4 and TGFBR2. *EMBO Rep* **16**, 1358-1377,  
350         doi:10.15252/embr.201540750 (2015).
- 351     4     Yu, F., Jiang, Z., Chen, B., Dong, P. & Zheng, J. NEAT1 accelerates the progression of liver fibrosis  
352         via regulation of microRNA-122 and Kruppel-like factor 6. *J Mol Med (Berl)* **95**, 1191-1202,  
353         doi:10.1007/s00109-017-1586-5 (2017).
- 354     5     Beaumont, J. *et al.* microRNA-122 down-regulation may play a role in severe myocardial fibrosis  
355         in human aortic stenosis through TGF-beta1 up-regulation. *Clin Sci (Lond)* **126**, 497-506,  
356         doi:10.1042/CS20130538 (2014).
- 357     6     Sun, Y. *et al.* miR-24 and miR-122 Negatively Regulate the Transforming Growth  
358         Factor-beta/Smad Signaling Pathway in Skeletal Muscle Fibrosis. *Mol Ther Nucleic Acids* **11**,  
359         528-537, doi:10.1016/j.omtn.2018.04.005 (2018).
- 360     7     Zeng, C. *et al.* Identification of a novel TGF-beta-miR-122-fibronectin 1/serum response factor  
361         signaling cascade and its implication in hepatic fibrogenesis. *Oncotarget* **6**, 12224-12233,  
362         doi:10.18632/oncotarget.3652 (2015).
- 363
- 364
